# Supplementary material
Source: PubMed Central journal article supplement (PMC5225044)
Supplement: NIHMS833769-supplement-1.pdf [file NIHMS833769-supplement-1.pdf]

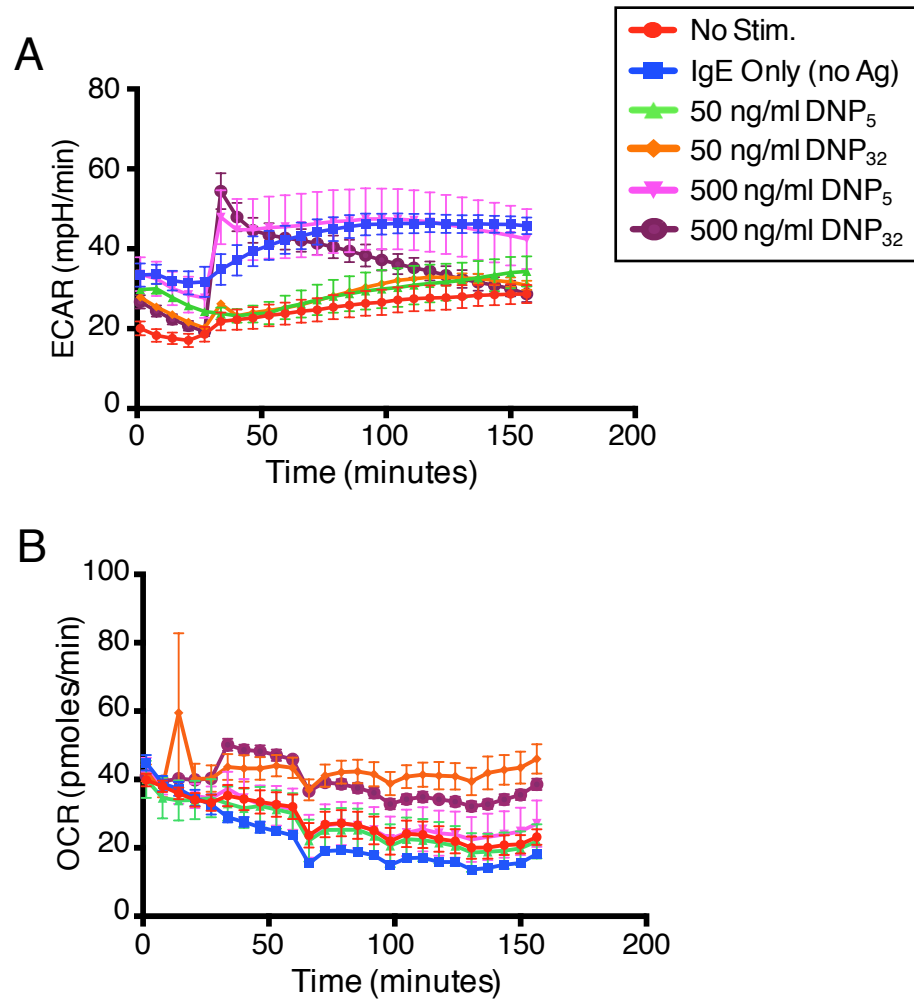

**Figure S1.** Seahorse analysis of unstimulated or acutely stimulated mast cells. (A) Extracellular acidification rate (ECAR), as a measure of glycolysis, was determined in mast cells that received no stimulation (red line), IgE alone (blue line) or IgE plus DNP antigen of the indicated valency and concentration. (B) Mast cells in the same wells as part A were analyzed for Oxygen consumption rate (OCR), as a measure of oxidative phosphorylation.

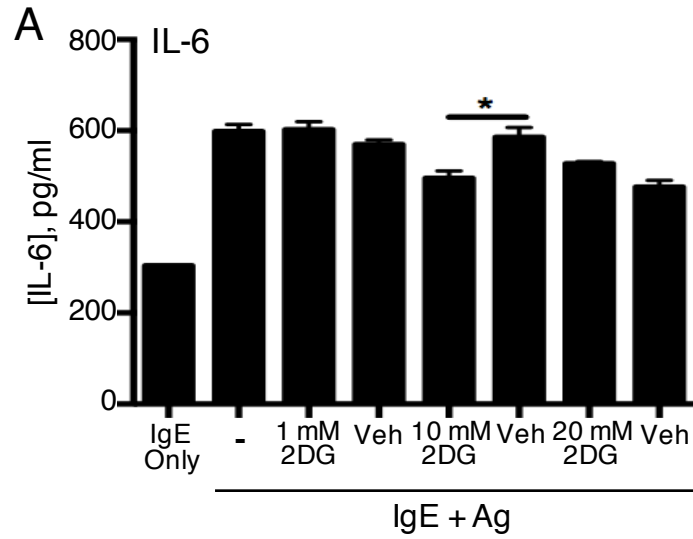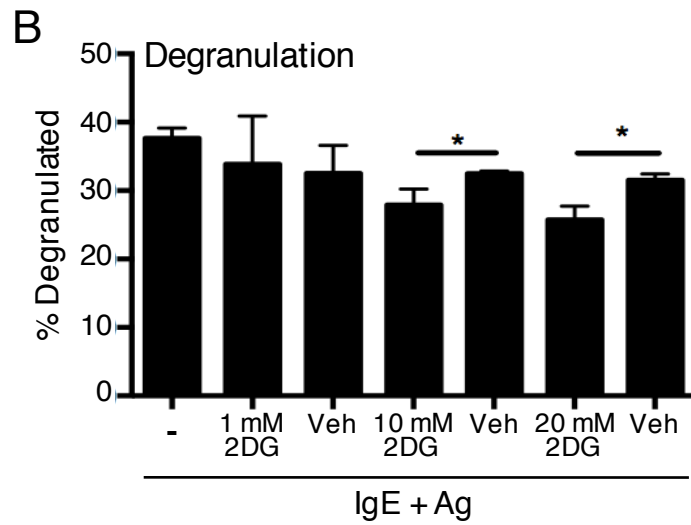

**Figure S2.** Glycolysis is required for optimal mast cell activation. BMMC's were sensitized with IgE overnight then stimulated as indicated.
